1 **Article title: “Clinical, Radiological and Therapeutic Characteristics of Patients with COVID-**  
2 **19 in Saudi Arabia”**

3 **Authors’ names:**

4 Mohammed Shabrawishi, M.D,<sup>1,2</sup> Manal M Al-Gethamy, M.D,<sup>3</sup> Abdallah Y Naser, PhD,<sup>4</sup> Maher A Ghazawi,  
5 M.D,<sup>5</sup> Ghaidaa F Alsharif, M.D,<sup>2</sup> Elaf F Obaid, M.D,<sup>2</sup> Haitham A Melebari, M.D,<sup>6</sup> Dhaffer M Alamri,<sup>3</sup> Ahmad  
6 S Brinji, M.D,<sup>5</sup> Fawaz H Al Jehani, M.D,<sup>7</sup> Wail Almaimani, M.D,<sup>7</sup> Rakan A Ekram, M.D,<sup>8</sup> Kasim H Alkhatib,  
7 M.D,<sup>9</sup> Hassan Alwafi, M.D<sup>10</sup>

8 **Authors affiliations:**

9 <sup>1</sup>Department of Respiratory Medicine, Al Noor Specialist Hospital, Mecca, Saudi Arabia.

10 <sup>2</sup>Department of Internal Medicine, Al Noor Specialist Hospital, Mecca, Saudi Arabia.

11 <sup>3</sup>Department of Infection Prevention and Control Programme, Al Noor Specialist Hospital, Mecca, Saudi  
12 Arabia.

13 <sup>4</sup>Faculty of Pharmacy, Isra University, Amman, Jordan.

14 <sup>5</sup>Department of Radiology, Al Noor Specialist Hospital, Mecca, Saudi Arabia.

15 <sup>6</sup>Department of Internal Medicine, King Faisal General Hospital, Mecca, Saudi Arabia.

16 <sup>7</sup>Al Noor Specialist Hospital, Mecca, Saudi Arabia.

17 <sup>8</sup>School of Public Health and Health Informatics, Umm Al Qura University, Mecca, Saudi Arabia.

18 <sup>9</sup>Intensive Care Department, Al Noor Specialist Hospital, Mecca, Saudi Arabia.

19 <sup>10</sup>Department of Clinical Pharmacology and Toxicology, Faculty of Medicine, Umm Al Qura University,  
20 Mecca, Saudi Arabia.

21

22 **Corresponding author**

23 Dr.Hassan Alwafi

24 Department of Clinical Pharmacology and Toxicology

25 Umm Alqura University, Faculty of Medicine

26 Mecca, Saudi Arabia

27 Post Code 24381

28 T +966555544319

29 Email: [hwafi@uqu.edu.sa](mailto:hwafi@uqu.edu.sa)

30 Number of words in abstract: 249 words

31 Number of words in main body text: 2,633 words

32 Number of tables in main body text: 4 table

33 Number of figures in main body text: 3 figures

34 Number of references in main body text: 34

35 **Abstract (249)**

36 **BACKGROUND**

37 Coronavirus disease 2019 (COVID-19) is a rapidly spreading global pandemic. The clinical  
38 characteristics of COVID-19 has been reported; however, there are limited researches that  
39 investigated the clinical characteristics of COVID-19 in the Middle East. The aim of this study is to  
40 investigate the clinical, radiological and therapeutic characteristics of patients diagnosed with  
41 COVID19 in Saudi Arabia.

42 **METHODS**

43 This study is a retrospective single-centre case series study. We extracted data for patients who were  
44 admitted to the Al-Noor Specialist hospital with a PCR confirmed SARS-COV-2 between 12th and  
45 31st of March 2020. Descriptive statistics were used to describe patients' characteristics. Continuous  
46 data were reported as mean  $\pm$  SD. Chi-squared test/Fisher test were used as appropriate to compare  
47 proportions for categorical variables.

48 **RESULTS**

49 A total of 150 patients were hospitalised for COVID-19 during the study period. The mean age was  
50 46.1 years (SD: 15.3 years). Around 61.0% (n= 90) were males and six patients (3.9%) reported  
51 working in the healthcare sector. The most common comorbidities were hypertension (28.8%, n= 42)  
52 and diabetes mellitus (26.0%, n= 38). The majority of the patients, 64.4% (n = 96) had a recent  
53 contact history with a COVID patient. Regarding the severity of the hospitalised patients, 105 patients  
54 (70.0%) were mild, 29 (19.3%) were moderate, and 16 patients (10.7%) were severe or required ICU  
55 care. From the 105 mild patients, around 31.3% (n= 47) were asymptomatic.

56 **CONCLUSION**

57 This case series provides clinical, radiological and therapeutic characteristics of hospitalised patients  
58 with confirmed COVID-19 in Saudi Arabia.

59 **KEYWORDS**

60 Clinical Characteristics, COVID-19, Retrospective case series, Radiological SARS-Cov2

61

## 62 1. INTRODUCTION

63 In early December 2019, a cluster of acute pneumonia of unknown aetiology has been identified in  
64 Wuhan, China (1). The pathogen has been identified as a new RNA virus from the betacoronavirus  
65 family, and has been named as severe acute respiratory syndrome coronavirus 2 (SARS-CoV-2) (2).  
66 The respiratory illness caused by the 2019 novel coronavirus disease (COVID-19) is highly  
67 infectious, and therefore, the World Health Organization (WHO) has characterized the diseases a  
68 pandemic infection (3). As of April 25, 2020, more than 2,700,000 confirmed cases were reported  
69 worldwide, and it has spread from Wuhan to more than 200 countries across the world (4).

70 The Kingdom of Saudi Arabia (KSA) is the largest country in the Arabian Peninsula and it is located  
71 in the South West part of Asia (5). In a historical decision, KSA has suspended Umrah and all  
72 religious visits to the country in an attempt to prevent and delay the spread of COVID-19 in KSA.  
73 However, in March 2, 2020, Saudi Arabia has confirmed its first case of COVID-19 which was  
74 imported from Iran (4). Several other local clusters were identified later with the majority of the cases  
75 being linked to recent travel history.

76 In recent studies, the clinical features and severity of COVID-19 has been described to be similar of  
77 other respiratory viruses such as severe acute respiratory syndrome (SARS) and Middle East  
78 respiratory syndrome (MERS) (6, 7). Symptoms can range from mild flu-like symptoms to acute  
79 respiratory distress syndrome (ARDS) (8). However, the characteristics and the course of the disease  
80 in Middle Eastern populations remains unclear. Exploring the clinical characteristics of patients  
81 diagnosed with COVID-19 in Saudi Arabia is important knowing that there are many visitors who  
82 travel to Saudi Arabia for religious purposes. Beside this, there is a high air traffic for other purposes  
83 in this country which was estimated to be around 39 million people in 2018. In 2019, around 7.5  
84 million Muslim entered the holy city of Mecca for Umrah purposes (9). This highlights how crucial is  
85 to have a deeper exploration on the characteristics of patients diagnosed with this widespread  
86 infection in this region. To address the above knowledge gaps and giving the ongoing spread of  
87 COVID-19 in the Middle East, this study aims to describe the clinical, radiological, and therapeutic  
88 characteristics of COVID-19 in a selected cohort of patients in Mecca, Saudi Arabia.

## 89 2. METHODS

### 90 2.1. Study Design and participants

91 This was a retrospective single-centre case series study of 150 patients diagnosed with COVID-19.  
92 We extracted data for patients who were admitted to Al-Noor Specialist hospital with a polymerase  
93 chain reaction (PCR) confirmed SARS-COV-2 between 12<sup>th</sup> and 31<sup>st</sup> of March 2020. Al-Noor  
94 Specialist hospital in Mecca, Saudi Arabia is a 500-bedder specialist and teaching hospital in the  
95 centre of the holy city of Mecca. It delivers tertiary care throughout the Mecca region of Saudi Arabia

96 and its part of the Ministry of Health services (10, 11). All patients enrolled in this study were  
97 diagnosed with COVID-19 through real time (RT)-PCR obtained through nasopharyngeal swabs. All  
98 data including outcomes, mortality and length of stay were monitored up to 8<sup>th</sup> April 2020.

## 99 **2.2. Data Collection**

100 Data were extracted from both paper and electronic records using a unique medical record number  
101 (MRN) for each patient. All data were reviewed and checked by a medical team including; two  
102 medical residents and a consultant Pulmonologist. Extracted data included patients' demographics,  
103 comorbidities, history of recent travel and history of contact with a confirmed COVID19 patient in the  
104 past two weeks. In addition, clinical signs, symptoms, radiological findings and pharmacological  
105 treatment received were collected. The radiological examinations were interpreted by a certified  
106 consultant radiologist who was blinded from the clinical presentation of the patients. The severity  
107 assessment of the chest x-ray (CXR) were estimated subjectively. All data were collected at the time  
108 of the admission.

## 109 **2.3. Study variables**

110 Data regarding the clinical progression and severity of the disease were reported as the worst  
111 classification reached at any point during hospitalisation. We further classified the severity of the  
112 disease based on the following criteria; 1) mild disease was defined as patients with upper respiratory  
113 tract symptoms (as rhinorrhoea, sore throat, headache, myalgia, body pain, low grade fever and or dry  
114 cough) with absent of clinical or radiological finding of pneumonia; 2) moderate disease defined as  
115 symptomatic patients with radiological sign of pneumonia; 3) severe disease defined as confirmed  
116 COVID-19 pneumonia with any of the following respiratory rate  $\geq 30$ /min, blood oxygen saturation  
117  $\leq 93\%$  at rest, PaO<sub>2</sub>/FiO<sub>2</sub> ratio  $< 300$ , lung infiltration  $> 50\%$  of the lung field, and 4) critically severe  
118 disease defined as any of the following: respiratory failure required invasive mechanical ventilation,  
119 shock or organ failure require admission to the intensive care unit.

## 120 **2.4. Ethics**

121 This study was approved by the institutional ethics board at the Ministry of Health in Saudi Arabia  
122 (No. H-02-K-076-0420-286). Patients were informed that their clinical data will be used for clinical or  
123 research purposes with keeping all their personal information confidential.

## 124 **2.5. Statistical Analysis**

125 Descriptive statistics were used to describe patients' demographic characteristics, radiological  
126 findings, medications use, and comorbidities. Continuous data were reported as mean  $\pm$  SD, and  
127 categorical data were reported as percentages (frequencies). Independent sample t test was used to

128 compare the mean value for continuous variables. Chi-squared test/Fisher test were used as  
129 appropriate to compare proportions for categorical variables. Logistic regression analysis was used to  
130 identify predictors of clinical characteristics. A confidence interval of 95% ( $p < 0.05$ ) was applied to  
131 represent the statistical significance of the results and the level of significance was assigned as 5%.  
132 SPSS (Statistical Package for the Social Sciences) version 25.0 software (SPSS Inc) was used to  
133 perform all statistical analysis.

### 134 3. RESULTS

#### 135 3.1. Patients clinical characteristics

136 **Table 1** presents patients' characteristics at presentation to the hospital. A total of 150 patients were  
137 hospitalised for COVID-19. The mean age was 46.1 years (SD: 15.3 years), and ranged between 11  
138 and 87. Around 61.0% (n= 90) were males. Six patients (3.9%) reported working in the healthcare  
139 sector. The most common comorbidities were hypertension (28.8%, n= 42) and diabetes mellitus  
140 (DM) (26.0%, n= 38). The majority of the patients (56.0%; n= 84) were local resident. Around half of  
141 the patients (54.1%, n= 80) reported that they had a contact history with a traveller. In addition, the  
142 majority of the patients, 64.4% (n = 96) had a contact history with a COVID-19 patient. Regarding the  
143 severity of the hospitalised patients, 105 patients (70.0%) were mild, 29 (19.3%) were moderate, and  
144 16 patients (10.7%) were severe or required ICU care. Of the 105 mild patients, around 31.3% (n= 47)  
145 were asymptomatic. Patients with comorbidities were more likely to have a severe outcome compared  
146 to other patients ( $p < 0.05$ ). Patients who reported a contact history with a COVID-19 patient were  
147 more likely to have mild to moderate severity of the disease ( $p < 0.05$ ). Mild cases were more prevalent  
148 among females, while moderate to severe and or critical were prevalent among males (**Figure 1**). For  
149 symptomatic patients, the most common symptoms at presentation were fever (49.3%, n= 72), dry  
150 cough (48.6%, n= 71), and shortness of breath (19.9%, n= 29) (**Table 2**). Furthermore, during  
151 admission, fever and cough (28%) were the most common symptoms followed by nausea and  
152 vomiting (12%). Most of the asymptomatic patients were females (OR: 0.45 [95%CI 0.22 – 0.92];  $p =$   
153 0.027). In addition, patients who reported travel history or a contact with a traveller recently were  
154 three times (OR: 3.13 [95%CI 1.52 – 6.45];  $p = 0.002$ ) and four times (OR: 4.03 [95%CI 1.84 – 8.81];  
155  $p = 0.000$ ) more likely to be asymptomatic, respectively. Besides, patients who have reported a contact  
156 with COVID-19 patients were four times at higher risk of being symptomatic (OR: 4.50 [95%CI 1.84  
157 – 10.99];  $p = 0.001$ ).

#### 158 3.2. Radiological findings

159 Around half of the patients (49.7%, n= 72) had normal radiological exam at presentation. The severity  
160 of the cases was correlated with an increase in the prevalence of GGO at presentation ( $P = 0.002$ ). The  
161 predominant pattern of abnormality observed was ground-glass opacification (29.0%, n= 42),

162 peripheral (57.5%, n= 42), and (bilateral (35.3%, n= 35), which was mainly involving the lower lobes  
163 (Figure 2). Most of the patients had stable radiological exams on follow up. Around 64.6% (n= 62)  
164 showed progression, half of them belongs to more severe group (**Table 3**).

### 165 **3.3. Recovery**

166 Patients stayed at the hospital for a mean duration of 9.2 days (SD: 3.9). Duration of stay in hospital  
167 ranged from two days to 23 days. At the end of the follow-up period a total of 94 patients (63.5%)  
168 recovered and 31.8% (n= 47) improved clinically but RT-PCR results were still positive. On the other  
169 hand, three patients (2.0%) did not fully recover and four patients (2.7%) deceased. There was no  
170 statistically significant difference based on the age regarding the recovery or whether the patient was  
171 symptomatic or asymptomatic upon presentation to hospital ( $p>0.05$ ). The majority of the patients  
172 with mild cases improved or recovered, however, there was no statistically significant difference  
173 between cases from different severity and recovery rate ( $p>0.05$ ) (**Figure 3**).

### 174 **3.4. Therapeutic management**

175 Beside supportive care, there were three main types of therapies that were prescribed to the patients  
176 for the management of COVID-19, this includes: a) antiviral therapy, b) antibiotics, and c)  
177 antimalarial medications (**Table 4**).

## 178 **4. DISCUSSION**

179 To the best of our knowledge, this is the first and largest study to examine the clinical characteristics  
180 of COVID-19 in the Middle East region. We investigated clinical, radiological, and therapeutic  
181 characteristics of COVID-19 in a 150 hospitalised patients in Saudi Arabia. We found that around  
182 89.0% of the cases were either mild or moderated and only 11.0% were either severe or critical. Our  
183 finding showed that the clinical severity of COVID-19 were of a milder presentation compared to  
184 results from China (12), Italy (13) and the United States (14, 15). These finding could be attributed to  
185 several factors including age and other demographics differences. The mean age in our study was 46.1  
186 years (SD: 15.3) which was younger than the age reported in other studies. Several studies have  
187 reported poorer outcome among older population and patients with COVID-19 and comorbidities (16-  
188 18). However, it is difficult to draw a causal inference and we urge for further studies to investigate  
189 this association. In addition, it is important to highlight that the majority of the Saudi Arabian  
190 population are younger than 44 years (19).

191 Male patients with COVID-19 were more prevalent in our study compared to females, this was also  
192 similar to previous reports which highlight more males to be infected with COVID-19 (2, 14). These  
193 numbers could be because of men sex-based immunological differences or it could also be because of  
194 behavioural patterns such as smoking (20). In addition, comorbidities are more prevalent in men

195 which could also be a reason for this difference (21), However, more researches must focus on gender  
196 differences and clinical outcomes with COVID-19.

197 Our study highlighted that around 28.8% and 26.0% of the study population had hypertension (HTN)  
198 and DM, these results were similar to previous reports that investigated the clinical characteristics of  
199 COVID-19 (1). Patients with DM and hypertension have an increased risk of complication of  
200 COVID-19 including acute respiratory distress syndrome (ARDS) (22), however, the mechanism of  
201 this remains un-investigated and it is unclear whether patients with uncontrolled blood pressure have a  
202 poorer outcomes of COVID-19 compared to patients with controlled blood pressure. In addition,  
203 Angiotensin-converting enzyme (ACE) inhibitors and angiotensin receptor blockers (ARBs) are two  
204 commonly prescribed medications for the management of HTN, and since SARS-CoV-2, binds to  
205 ACE2 in the lung, some theoretical theories have been raised about the benefits of these medications  
206 in the treatment of COVID-19 (23).

207 SARS-COV2 has been described to be similar to seasonal influenza, SARS-COV and MERS, this  
208 includes the fact that it is transmitted through respiratory droplets (24, 25). In addition, SARS-COV2  
209 has similar symptoms to SARS-COV and MERS such as; fever, cough, and shortness of breath. This  
210 was reported in our study and it was also in line with previous studies (6, 13), however, SARS-COV2  
211 has a higher case fatality rate in comparison to seasonal flu (0.1%) while it is also milder in  
212 comparison to other respiratory viruses such as SARS-COV (9.5%) and MERS (34.3%) (26). Besides  
213 this, COVID-19 is a highly infectious pathogenic (27, 28), with some reports suggested that half of  
214 the United Kingdom (UK) population has been infected without showing any symptoms or with  
215 having a mild course of the disease (29). Our study demonstrated that around 31.3% of the study  
216 sample were asymptomatic and had a mild disease. Mostly, these patients were identified through  
217 contact tracing and were isolated in the earlier course of the disease, whether this approach have any  
218 impact on the clinical course psychologically, this might need to be addressed in future studies. In  
219 addition, the majority of these patients had a contact with a confirmed COVID-19 patients which may  
220 raise concerns regarding the mechanism and the underlying inflammatory response in these patients.  
221 More researches are encouraged to investigate the characteristics of asymptomatic patients and if  
222 early detection and supportive treatment have a role in the clinical progression of the disease.

223 In our study, and unlike previous reports, nearly half of the patients presented with normal CXR, most  
224 of them were asymptomatic or had a mild disease. Furthermore, normal CXR at presentation may  
225 have a prognostic rule as only few numbers of those patients progressed into more severe cases. On  
226 the other hand, presence of ground glass opacity is linked with more aggressive course. The patterns  
227 found in abnormal exams were similar to the previously published reports and findings where  
228 peripheral, bilateral ground glass opacification (30).

229 Our study highlighted that around 26.7% of the patients received antimalarial treatment and around  
230 9.0% received antiviral treatment, these medications have been suggested to have some beneficial  
231 effect to reduce the viral load and eliminate the disease, however, there are also uncertainties



232 regarding their safety (31, 32). In addition, there has been debate about their efficacy in the treatment  
233 of COVID-19 with several trials are now in pipeline for the testing of these medications (33). To date,  
234 there is no treatment for COVID-19, and the main approach in the management of the disease is to  
235 provide supportive treatment and to control the symptoms including mechanical ventilator for critical  
236 cases (34). This study has some limitations. First, the number of patients included in the study were  
237 small. Second, the study population only included patients from a single-centre hospital in Saudi  
238 Arabia.

## 239 **5. CONCLUSION**

240 This case series provides clinical, radiological, and therapeutic characteristics of hospitalised patients  
241 with confirmed COVID-19 in Saudi Arabia. Our study demonstrates similar characteristics of  
242 COVID-19 to previously reported studies worldwide.

### 243 **Conflict of interest**

244 The authors have stated explicitly that there are no conflicts of interest in connection with this article.

### 245 **Authors contribution**

246 Shabrawishi, Naser, Ghazawi and Alwafi had full access to all the data in the study and take  
247 responsibility for the integrity of the data and the accuracy of the data analysis. Shabrawishi and  
248 Alwafi had the original idea for this study. Shabrawishi, Naser and Alwafi contributed to the design of  
249 the study. Obaid and Alsharif contributed to the data collection. Naser and Alwafi contributed in the  
250 statistical analysis. Shabrawishi, Naser, Ekram and Alwafi wrote the first draft. All the authors  
251 contributed to interpretation and edited the draft report.

### 252 **Data availability statement**

253 The data that support the findings of this study are available from the corresponding author upon reasonable  
254 request.

### 255 **References:**

- 256 1. Wang D, Hu B, Hu C, Zhu F, Liu X, Zhang J, et al. Clinical Characteristics of 138 Hospitalized  
257 Patients With 2019 Novel Coronavirus-Infected Pneumonia in Wuhan, China. *JAMA*.  
258 2020;323(11):1061-9.
- 259 2. Guan W-j, Ni Z-y, Hu Y, Liang W-h, Ou C-q, He J-x, et al. Clinical Characteristics of Coronavirus  
260 Disease 2019 in China. 2020.
- 261 3. WHO. Coronavirus disease 2019 (COVID-19) Situation Report –96 2020 [Available from:  
262 [https://www.who.int/docs/default-source/coronaviruse/situation-reports/20200425-sitrep-96-](https://www.who.int/docs/default-source/coronaviruse/situation-reports/20200425-sitrep-96-covid-19.pdf?sfvrsn=a33836bb_2)  
263 [covid-19.pdf?sfvrsn=a33836bb\\_2](https://www.who.int/docs/default-source/coronaviruse/situation-reports/20200425-sitrep-96-covid-19.pdf?sfvrsn=a33836bb_2).
- 264 4. Who. Coronavirus disease (COVID-19) outbreak 2020 [Available from:  
265 <https://www.who.int/emergencies/diseases/novel-coronavirus-2019>.



- 266 5. MOFA. About Saudi Arabia 2020 [Available from:  
267 <https://www.mofa.gov.sa/sites/mofaen/aboutKingDom/Pages/KingdomGeography46466.aspx>.
- 268 6. Chen N, Zhou M, Dong X, Qu J, Gong F, Han Y, et al. Epidemiological and clinical  
269 characteristics of 99 cases of 2019 novel coronavirus pneumonia in Wuhan, China: a descriptive  
270 study. *Lancet* (London, England). 2020;395(10223):507-13.
- 271 7. Livingston E, Bucher K. Coronavirus Disease 2019 (COVID-19) in Italy. *JAMA*. 2020.
- 272 8. Chang D, Lin M, Wei L, Xie L, Zhu G, Dela Cruz CS, et al. Epidemiologic and Clinical  
273 Characteristics of Novel Coronavirus Infections Involving 13 Patients Outside Wuhan, China. *JAMA*.  
274 2020;323(11):1092-3.
- 275 9. Ebrahim SH, Memish ZA. COVID-19: preparing for superspreader potential among Umrah  
276 pilgrims to Saudi Arabia. *The Lancet*. 2020;395(10227).
- 277 10. Zaglool DA, Khodari YA, Gazzaz ZJ, Dhafar KO, Shaker HA, Farooq MU. Prevalence of  
278 Intestinal Parasites among Patients of Al-Noor Specialist Hospital, Makkah, Saudi Arabia. *Oman Med*  
279 *J*. 2011;26(3):182-5.
- 280 11. Health Mo. Al Noor Specialist Hospital 2020 [Available from:  
281 <http://nsh.med.sa/Pages/Home.aspx>.
- 282 12. Wu Z, McGoogan JM. Characteristics of and Important Lessons From the Coronavirus  
283 Disease 2019 (COVID-19) Outbreak in China: Summary of a Report of 72,314 Cases From the Chinese  
284 Center for Disease Control and Prevention. *JAMA*. 2020;323(13):1239-42.
- 285 13. Livingston E, Bucher K. Coronavirus Disease 2019 (COVID-19) in Italy. *JAMA*.  
286 2020;323(14):1335-.
- 287 14. Goyal P, Choi JJ, Pinheiro LC, Schenck EJ, Chen R, Jabri A, et al. Clinical Characteristics of  
288 Covid-19 in New York City. 2020.
- 289 15. Richardson S, Hirsch JS, Narasimhan M, Crawford JM, McGinn T, Davidson KW, et al.  
290 Presenting Characteristics, Comorbidities, and Outcomes Among 5700 Patients Hospitalized With  
291 COVID-19 in the New York City Area. *JAMA*. 2020.
- 292 16. Mahase E. Covid-19: death rate is 0.66% and increases with age, study estimates.  
293 2020;369:m1327.
- 294 17. Verity R, Okell LC, Dorigatti I, Winskill P, Whittaker C, Imai N, et al. Estimates of the severity  
295 of coronavirus disease 2019: a model-based analysis. *The Lancet Infectious diseases*. 2020.
- 296 18. Dowd JB, Andriano L, Brazel DM, Rotondi V, Block P, Ding X, et al. Demographic science aids  
297 in understanding the spread and fatality rates of COVID-19. 2020:202004911.
- 298 19. Statistics Gaf. Statistical Yearbook of 2016 2016 [Available from:  
299 <https://www.stats.gov.sa/en/5305>.
- 300 20. Wenham C, Smith J, Morgan R. COVID-19: the gendered impacts of the outbreak. *Lancet*  
301 (London, England). 2020;395(10227):846-8.
- 302 21. The L. The gendered dimensions of COVID-19. *Lancet* (London, England).  
303 2020;395(10231):1168.
- 304 22. Fang L, Karakiulakis G, Roth M. Are patients with hypertension and diabetes mellitus at  
305 increased risk for COVID-19 infection? *The Lancet Respiratory medicine*. 2020;8(4):e21.
- 306 23. Schiffrin EL, Flack JM, Ito S, Muntner P, Webb RC. Hypertension and COVID-19. *American*  
307 *Journal of Hypertension*. 2020.
- 308 24. Otter JA, Donskey C, Yezli S, Douthwaite S, Goldenberg SD, Weber DJ. Transmission of SARS  
309 and MERS coronaviruses and influenza virus in healthcare settings: the possible role of dry surface  
310 contamination. *The Journal of hospital infection*. 2016;92(3):235-50.
- 311 25. WHO. Modes of transmission of virus causing COVID-19: implications for IPC precaution  
312 recommendations 2020 [Available from: [https://www.who.int/publications-detail/modes-of-](https://www.who.int/publications-detail/modes-of-transmission-of-virus-causing-covid-19-implications-for-ipc-precaution-recommendations)  
313 [transmission-of-virus-causing-covid-19-implications-for-ipc-precaution-recommendations](https://www.who.int/publications-detail/modes-of-transmission-of-virus-causing-covid-19-implications-for-ipc-precaution-recommendations).
- 314 26. Rajgor DD, Lee MH, Archuleta S, Bagdasarian N, Quek SC. The many estimates of the COVID-  
315 19 case fatality rate. *The Lancet Infectious diseases*. 2020.

- 316 27. Zhang S, Diao M, Yu W, Pei L, Lin Z, Chen D. Estimation of the reproductive number of novel  
 317 coronavirus (COVID-19) and the probable outbreak size on the Diamond Princess cruise ship: A data-  
 318 driven analysis. *International journal of infectious diseases : IJID : official publication of the*  
 319 *International Society for Infectious Diseases.* 2020;93:201-4.
- 320 28. Liu Y, Gayle AA, Wilder-Smith A, Rocklöv J. The reproductive number of COVID-19 is higher  
 321 compared to SARS coronavirus. *Journal of Travel Medicine.* 2020;27(2).
- 322 29. Sayburn A. Covid-19: experts question analysis suggesting half UK population has been  
 323 infected. 2020;368:m1216.
- 324 30. Shi H, Han X, Jiang N, Cao Y, Alwalid O, Gu J, et al. Radiological findings from 81 patients with  
 325 COVID-19 pneumonia in Wuhan, China: a descriptive study. *The Lancet Infectious Diseases.*  
 326 2020;20(4):425-34.
- 327 31. Ferner RE, Aronson JK. Chloroquine and hydroxychloroquine in covid-19. 2020;369:m1432.
- 328 32. Cortegiani A, Ingoglia G, Ippolito M, Giarratano A, Einav S. A systematic review on the  
 329 efficacy and safety of chloroquine for the treatment of COVID-19. *Journal of critical care.* 2020.
- 330 33. Taccone FS, Gorham J, Vincent JL. Hydroxychloroquine in the management of critically ill  
 331 patients with COVID-19: the need for an evidence base. *The Lancet Respiratory medicine.* 2020.
- 332 34. NICE. COVID-19 rapid guideline: managing suspected or confirmed pneumonia in adults in  
 333 the community 2020 [Available from: <https://www.nice.org.uk/guidance/ng165>].

### 334 TABLES LEGENDS

335 Table 1: Patients demographic characteristics at presentation.

336 Table 2: Patient signs and symptoms at presentation and during admission.

337 Table 3: Radiological findings.

338 Table 4: Initial treatment characteristics.

### 339 FIGURES LEGENDS

340 Figure 1: Clinical severity stratified by gender.

341 Figure 2: CXR's of two different patients showing the most common abnormalities: bilateral,  
 342 peripheral ground glass opacities and consolidation

343 Figure 3: Recovery rates stratified by case severity

### 344 TABLES

345 **Table 2: Patients demographic characteristics at presentation.**

| Demographics               | All patients<br>(n=150) | Mild cases<br>(n= 105) | Moderate cases<br>(n= 29) | Severe/Intensive<br>care unit cases<br>(n= 16) | P-value |
|----------------------------|-------------------------|------------------------|---------------------------|------------------------------------------------|---------|
| Age (years; mean (SD))     | 46.1 years<br>(15.3)    | 45.4 years<br>(±16.0)  | 46.7 years<br>(±12.1)     | 49.8 years<br>(±15.7)                          | 0.550   |
| Gender                     |                         |                        |                           |                                                |         |
| Female No. (%)             | 60 (40.0)               | 47 (44.8)              | 10 (34.5)                 | 3 (18.8)                                       | 0.112   |
| Healthcare worker          |                         |                        |                           |                                                |         |
| Yes No. (%)                | 6 (4.0)                 | 6 (5.8)                | 0                         | 0                                              | 0.110   |
| Place of residency No. (%) |                         |                        |                           |                                                |         |
| Kingdom of Saudi<br>Arabia | 84 (56.0)               | 57 (54.3)              | 15 (51.7)                 | 12 (75.0)                                      | 0.084   |
| Other countries            | 66 (44.0)               | 48 (45.7)              | 14 (48.3)                 | 4 (25.0)                                       | 0.239   |
| Comorbidities No. (%)      |                         |                        |                           |                                                |         |

|                                             |           |           |           |           |         |
|---------------------------------------------|-----------|-----------|-----------|-----------|---------|
| Hypertension                                | 42 (28.8) | 29 (27.6) | 10 (35.7) | 3 (23.1)  | 0.627   |
| Diabetes mellitus                           | 38 (26.0) | 20 (19.0) | 11 (39.3) | 7 (53.8)  | 0.005** |
| Coronary artery disease                     | 11 (7.5)  | 5 (4.8)   | 3 (10.7)  | 3 (23.1)  | 0.094   |
| Renal disease                               | 10 (6.8)  | 5 (4.8)   | 1 (3.6)   | 4 (30.8)  | 0.018*  |
| Thyroid gland problem (hypothyroidism)      | 9         | 4 (8.2)   | 2 (11.1)  | 3 (37.5)  | 0.123   |
| Asthma                                      | 4 (2.7)   | 3 (2.9)   | 0         | 1 (7.7)   | 0.306   |
| Cancer                                      | 2 (1.4)   | 0         | 0         | 2 (15.4)  | 0.007** |
| CVA                                         | 1 (0.7)   | 1 (1.0)   | 0         | 0         | 0.718   |
| COPD                                        | 1 (0.7)   | 0         | 0         | 1 (7.7)   | 0.086   |
| CLD                                         | 1 (0.7)   | 0         | 0         | 1 (7.7)   | 0.086   |
| <b>Tracing history No. (%)</b>              |           |           |           |           |         |
| Recent travel history (Yes) No. (%)         | 65 (43.9) | 47 (45.6) | 14 (48.3) | 4 (25.0)  | 0.263   |
| Contact with traveller (Yes) No. (%)        | 80 (54.1) | 57 (55.3) | 18 (62.1) | 5 (31.3)  | 0.124   |
| Contact with COVID-19 patient (Yes) No. (%) | 96 (64.4) | 71 (68.3) | 20 (69.0) | 5 (31.3)  | 0.013*  |
| <b>Outcome (n= 148) No. (%)</b>             |           |           |           |           |         |
| Deceased                                    | 4 (2.7)   | 2 (1.9)   | 0         | 2 (12.5)  | 0.086   |
| Improved                                    | 47 (31.8) | 37 (35.2) | 6 (22.2)  | 4 (25.0)  | 0.358   |
| Not recovered                               | 3 (2.0)   | 2 (1.9)   | 1 (3.7)   | 0         | 0.615   |
| Recovered                                   | 94 (63.5) | 64 (61.0) | 20 (74.1) | 10 (62.5) | 0.434   |

346 Abbreviations; COVID-19: coronavirus disease-2019; CVA: cerebrovascular accident; COPD: chronic

347 obstructive pulmonary disease; CLD: chronic liver disease; SD: Standard deviation; No: Number (frequency)

348 **Table 2: Patient signs and symptoms at presentation and during admission.**

| Variable            | Symptoms                |                          | P-vale   |
|---------------------|-------------------------|--------------------------|----------|
|                     | At presentation No. (%) | During admission No. (%) |          |
| Fever               | 72 (49.3)               | 28 (19.2)                | 0.029*   |
| Cough               | 71 (48.6)               | 28 (19.2)                | 0.024*   |
| Shortness of breath | 29 (19.9)               | 7 (4.8)                  | 0.000*** |
| Sore throat         | 24 (16.4)               | 2 (1.4)                  | 0.269    |
| Runny nose          | 9 (6.2)                 | 0 (0.0)                  | >0.99    |
| Sputum              | 5 (3.4)                 | 1 (0.7)                  | 0.034*   |
| Headache            | 4 (2.7)                 | 0 (0.0)                  | >0.99    |
| Myalgia             | 4 (2.7)                 | 1 (0.7)                  | 0.813    |
| Diarrhea            | 2 (1.4)                 | 5 (3.4)                  | 0.068    |
| Nausea/vomiting     | 1 (0.4)                 | 12 (8.2)                 | 0.678    |
| Haemoptysis         | 1 (0.4)                 | 1 (0.7)                  | 0.887    |
| Fatigue             | 1 (0.4)                 | 1 (0.7)                  | 0.907    |

349 \* p<0.05; \*\*p<0.01; \*\*\*p<0.000

350 **Table 3: Radiological findings.**

| <b>Radiological findings (CXR) upon admission</b> |                      |                     |                        |                                          |          |
|---------------------------------------------------|----------------------|---------------------|------------------------|------------------------------------------|----------|
|                                                   | All patients (n=150) | Mild cases (n= 105) | Moderate cases (n= 29) | Severe/Intensive care unit cases (n= 16) | P-value  |
| <b>Predominant finding</b>                        |                      |                     |                        |                                          |          |
| Normal                                            | 72 (49.7)            | 62 (60.2)           | 7 (25.9)               | 3 (20.0)                                 | 0.000*** |
| Ground glass opacity                              | 42 (29.0)            | 21 (20.4)           | 13 (48.1)              | 8 (53.3)                                 | 0.002*   |
| Consolidation                                     | 26 (17.9)            | 16 (15.5)           | 6 (22.2)               | 4 (26.7)                                 | 0.488    |
| Linear atelectasis                                | 3 (2.1)              | 3 (2.9)             | 0                      | 0                                        | 0.354    |
| Diffusion reticular opacities                     | 1 (0.7)              | 1 (1.0)             | 0                      | 0                                        | 0.795    |
| Reticulation                                      | 1 (0.7)              | 0                   | 1                      | 0                                        | 0.183    |

| Distribution within the lobe |           |           |           |           |          |
|------------------------------|-----------|-----------|-----------|-----------|----------|
| Central                      | 10 (13.7) | 6 (14.6)  | 2 (10.0)  | 2 (16.7)  | 0.833    |
| Diffuse                      | 21 (28.8) | 14 (34.1) | 4 (20.0)  | 3 (25.0)  | 0.494    |
| Peripheral                   | 42 (57.5) | 21 (51.2) | 14 (70.0) | 7 (58.3)  | 0.378    |
| Distribution within the lung |           |           |           |           |          |
| Lower                        | 24 (32.9) | 12 (29.3) | 6 (30.0)  | 6 (50.0)  | 0.385    |
| Lower middle                 | 22 (30.1) | 10 (24.4) | 9 (45.0)  | 3 (25.0)  | 0.236    |
| Lower and middle and upper   | 10 (13.7) | 8 (19.5)  | 2 (10.0)  | 0         | 0.089    |
| Diffuse                      | 10 (13.7) | 6 (14.6)  | 2 (10.0)  | 2 (16.7)  | 0.833    |
| Peripheral                   | 2 (2.7)   | 2 (4.9)   | 0         | 0         | 0.309    |
| Middle                       | 2 (2.7)   | 2 (4.9)   | 0         | 0         | 0.309    |
| Upper                        | 1 (1.4)   | 1 (2.4)   | 0         | 0         | 0.559    |
| Upper and middle             | 1 (1.4)   | 0         | 0         | 1 (8.3)   | 0.159    |
| No zonal predominance        | 1 (1.4)   | 0         | 1 (5.0)   | 0         | 0.269    |
| Laterality                   |           |           |           |           |          |
| Bilateral                    | 53 (35.3) | 27 (25.7) | 16 (55.2) | 10 (62.5) | 0.000*** |
| Unilateral right             | 12 (16.4) | 10 (24.4) | 2 (10.0)  | 0         | 0.035*   |
| Unilateral left              | 8 (11.0)  | 4 (9.8)   | 2 (10.0)  | 2 (16.7)  | 0.805    |
| Progression                  |           |           |           |           |          |
| Stable                       | 62 (64.6) | 49 (74.2) | 11 (57.9) | 2 (18.2)  | 0.001**  |
| Worsen                       | 34 (35.4) | 17 (25.8) | 8 (42.1)  | 9 (81.8)  |          |

351 CXR: chest x-ray

352 **Table 4: Initial treatment characteristics.**

| Treatment therapy                                                     | Frequency (%) |
|-----------------------------------------------------------------------|---------------|
| Antiviral therapy                                                     |               |
| Combination of antiretroviral (lopinavir and ritonavir) and ribavirin | 14 (9.3)      |
| Antimalarial therapy                                                  |               |
| Hydroxychloroquine                                                    | 25 (16.7)     |
| Chloroquine                                                           | 15 (10.0)     |
| Antibiotics therapy                                                   | 58 (38.7)     |

353

354 **FIGURES**

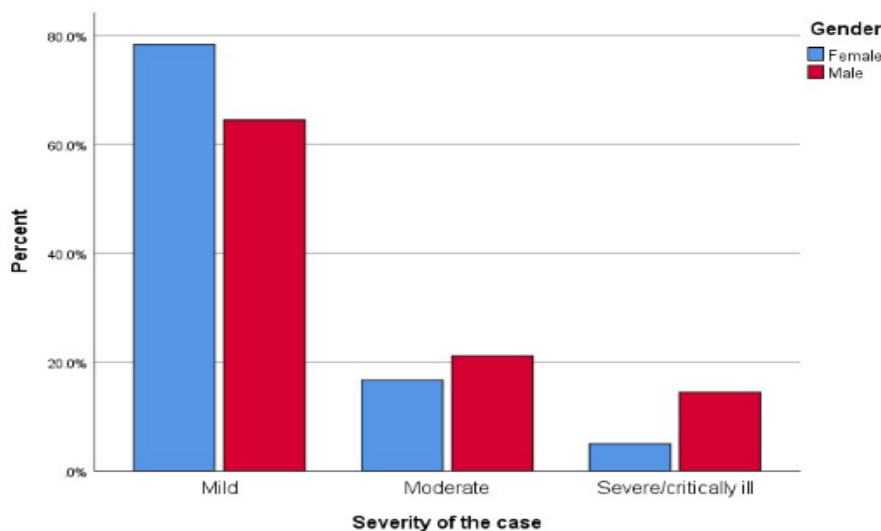

355

356

357 Figure 1: Clinical severity stratified by gender.

358

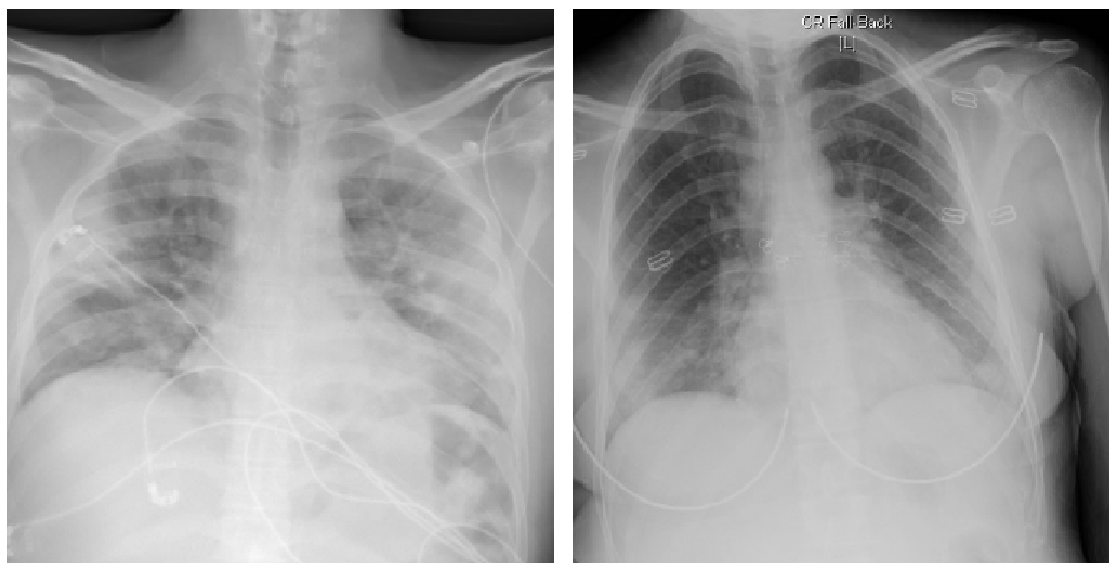

359

360 Figure 2: CXR's of two different patients showing the most common abnormalities: bilateral,  
361 peripheral ground glass opacities and consolidation

362

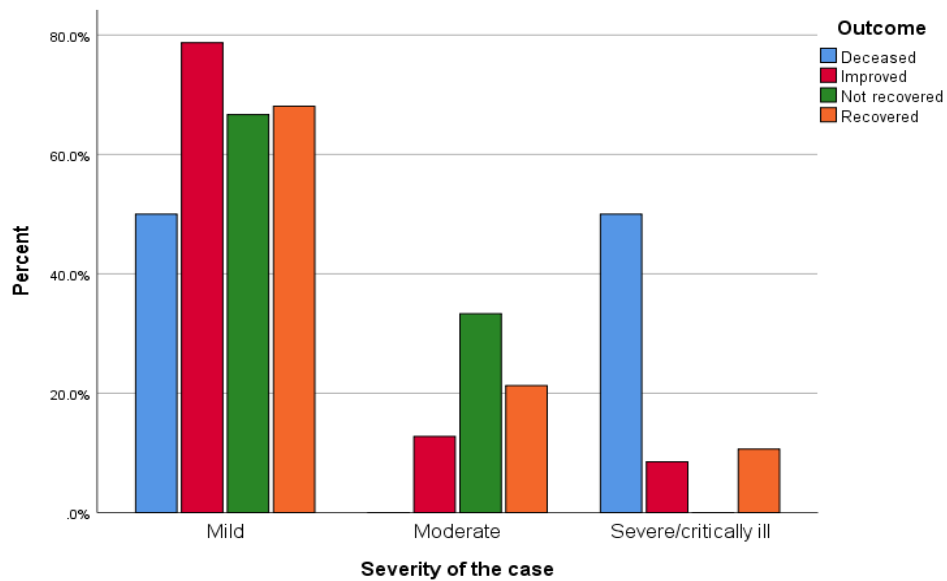

363

364

365 Figure 3: Recovery rates stratified by case severity
